# Supplementary material
Source: Springer Nature journal article supplement (https://www.springermedizin.de/resource/supplementary/12874_2007_230_MOESM3_ESM.pdf/9434040)
Supplement: MOESM3 [file 9434040]

No. Eligible  
**203**

|                                       |           |
|---------------------------------------|-----------|
| No. Refused to Participate            | <b>28</b> |
| - refused to sign consent form        | <b>8</b>  |
| - afraid of interfering with lab test | <b>6</b>  |
| - not feeling well                    | <b>6</b>  |
| - no reading glasses                  | <b>5</b>  |
| - no reason                           | <b>3</b>  |

No. Surveyed  
**175**
